# Supplementary material for: OMKar automates genome karyotyping using optical maps to identify constitutional abnormalities
Source: HighWire-hosted journal article supplement (doi:10.1101/gr.280536.125), 2025-11-14
Supplement: Supplemental_Code.zip [file OMSim_parameters.xlsx]

## Sheet: Sheet1
Parameter	Value (default)	Value (BNGO)	Description
coverage	1	50	Minimal desired coverage
chips	1	1	Number of chips that will be used, this takes precedence over coverage
scans_per_chip	30	30	Number of scans taken per chip
scan_size	16	16	Scan size in Mbp
avg_mol_len	5000000	300000	Average molecule length
sd_mol_len	800000	100000	Standard deviation of the molecule length
min_mol_len	800000	20000	Minimal molecule length
max_mol_len	12000000	600000	Maximal molecule length
stretch_factor	0.85	0.85	Average stretch factor
stretch_chip_sd	0.01	0.001	Standard deviation of stretch factor per chip
stretch_scan_sd	0.001	0.015	Standard deviation of stretch factor per scan
min_nicks	1	1	Minimal number of labels required per read
nick_sd	50	50	Additional normal noise
fragile_same	1	-1	Distance at which fragile sites on one strand have 50% chance to break
fragile_opposite	-1	-1	Distance at which fragile sites on opposite strands have 50% chance to break
fragile_treshold	0	0	If the distance is further away than treshold from the 50% point, then break chance is 100% (left) or 0% (right)
fragile_factor	3	3	Factor determining the steepness of the fragile location cutoff when the distance is less than fragile_treshold away from the 50% point
label_mu	1500	1500	Distance between labels where there is 50% chance of collapsing them unto one label
label_treshold	500	1000	Similar to fragile_treshold, but now for label collapsing
label_factor	100	500	Similar to fragile_factor, but now for label collapsing
chimera_rate	0.01	0.15	Percent of the reads that will be extend as a chimera
chimera_mu	1500	1500	Mean of the normal distribution determining the distance added between two parts of a chimeric read
chimera_sigma	500	500	SD of the normal distribution determining the distance added between two parts of a chimeric read
seed	0	0	The seed used for all pseudo random number generators
Enzymes.xml	Multiple enzymes can be specified in a single run, resulting in Multiple bnxs named by the id specified by id in enzyme.xm i.e. DLE1.bnx
Parameter	Value (default)	Value (BNGO)	Description
id	NA	DLE1	id, used to specify when this enzyme should be used
pattern	NA	CTTAAG	enzymeing pattern
fp	1	1.5	number of false positives per 100kbp
fn	0.15	0.15	rate of false negatives
To avoid introduction of fragile sites the following parameters need to be set:
Parameter	Value
fragile_same	-1
fragile_opposite	-1
fragile_treshold	0
