# Supplementary material for: OMKar automates genome karyotyping using optical maps to identify constitutional abnormalities
Source: HighWire-hosted journal article supplement (doi:10.1101/gr.280536.125), 2025-11-14
Supplement: Supplemental_Figure_Code.zip [file Balanced SVs.pdf › Supplemental_Figure_Code/OMKar_Manuscript_Figures-main/figures/Balanced SVs.pdf]

## Balanced SVs

## Karyotyping Concordance

## CMA Concordance

## FISH Concordance

## OMKar Concordance
