# Supplementary figures and images for: OMKar automates genome karyotyping using optical maps to identify constitutional abnormalities
Source: HighWire-hosted journal article supplement (doi:10.1101/gr.280536.125), 2025-11-14

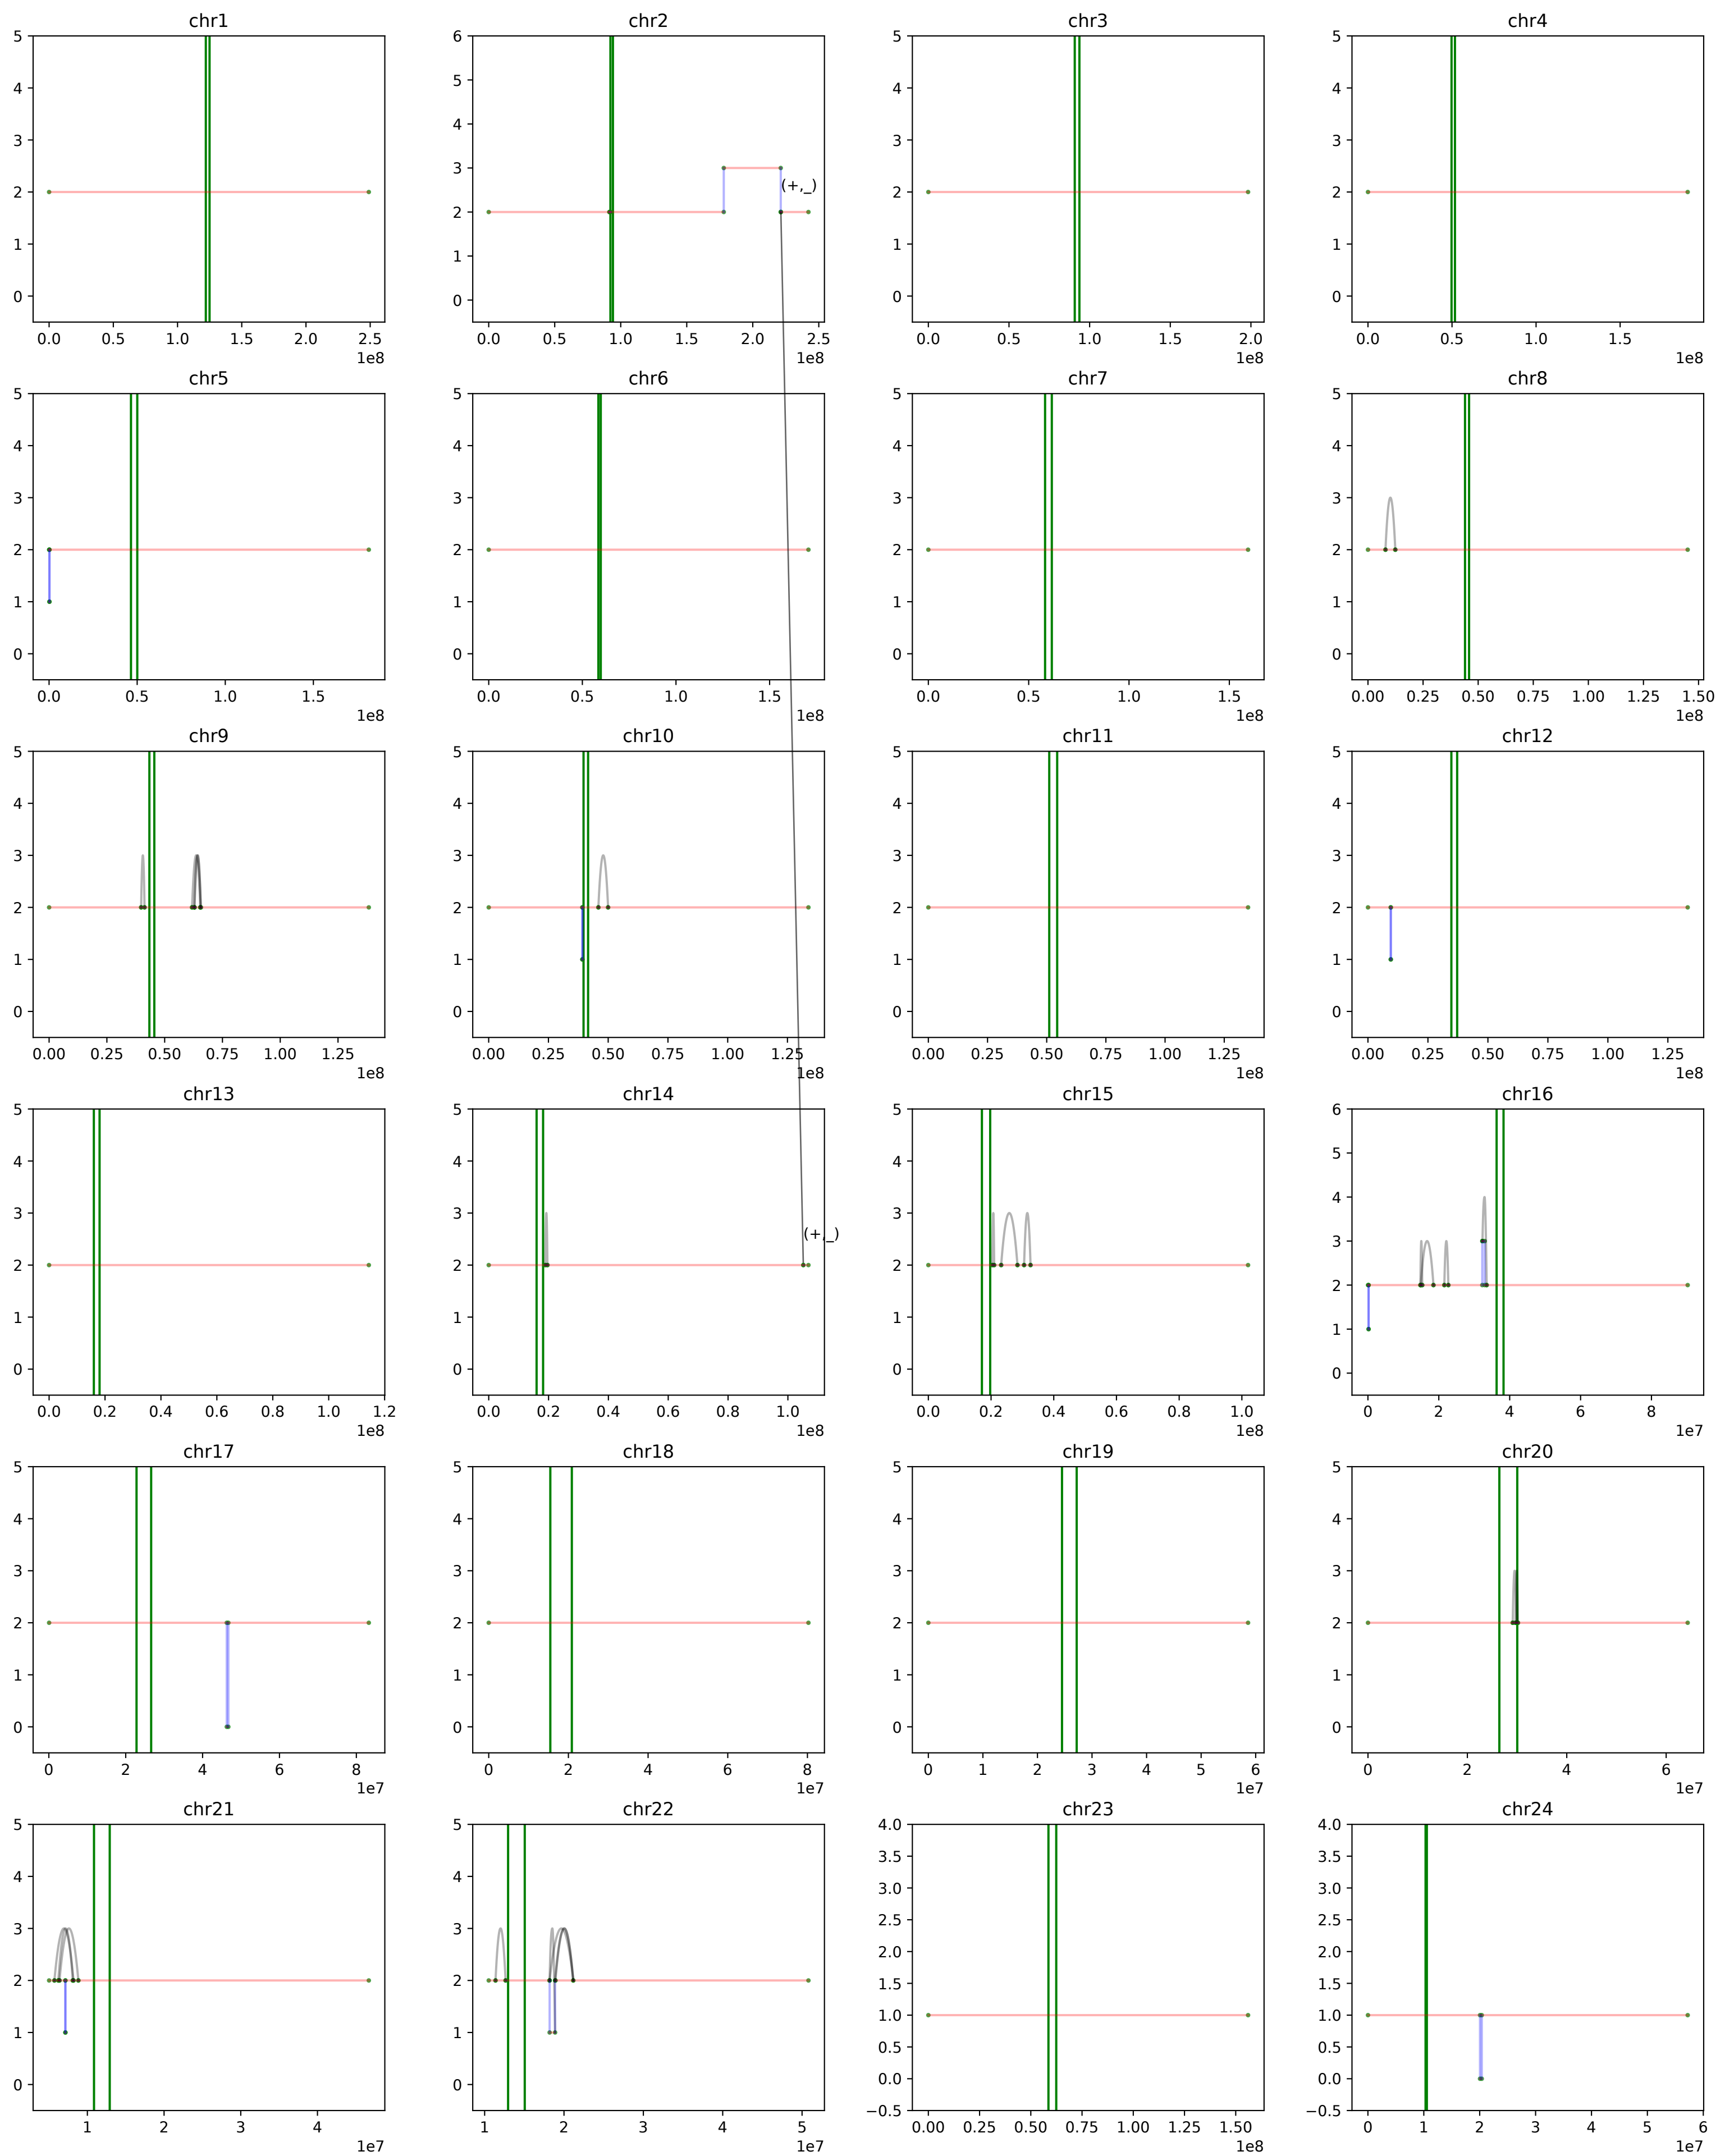

Supplement: Supplemental_Code.zip [file test_input.pdf › Supplemental_Code/OMKar-main/test_intended_output/omkar_output/test_input/test_input.pdf]

## DuplInv Distances

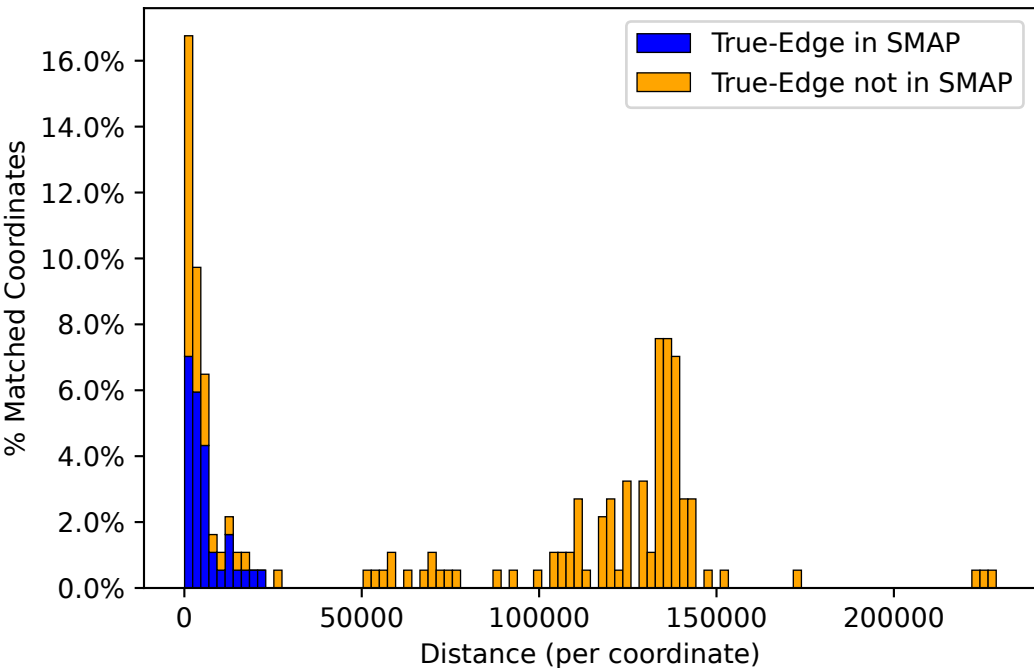

Supplement: Supplemental_Figure_Code.zip [file DUPINV.pdf › Supplemental_Figure_Code/OMKar_Manuscript_Figures-main/figures/DUPINV.pdf]

Distribution of SV Sizes (0-200 kbp)

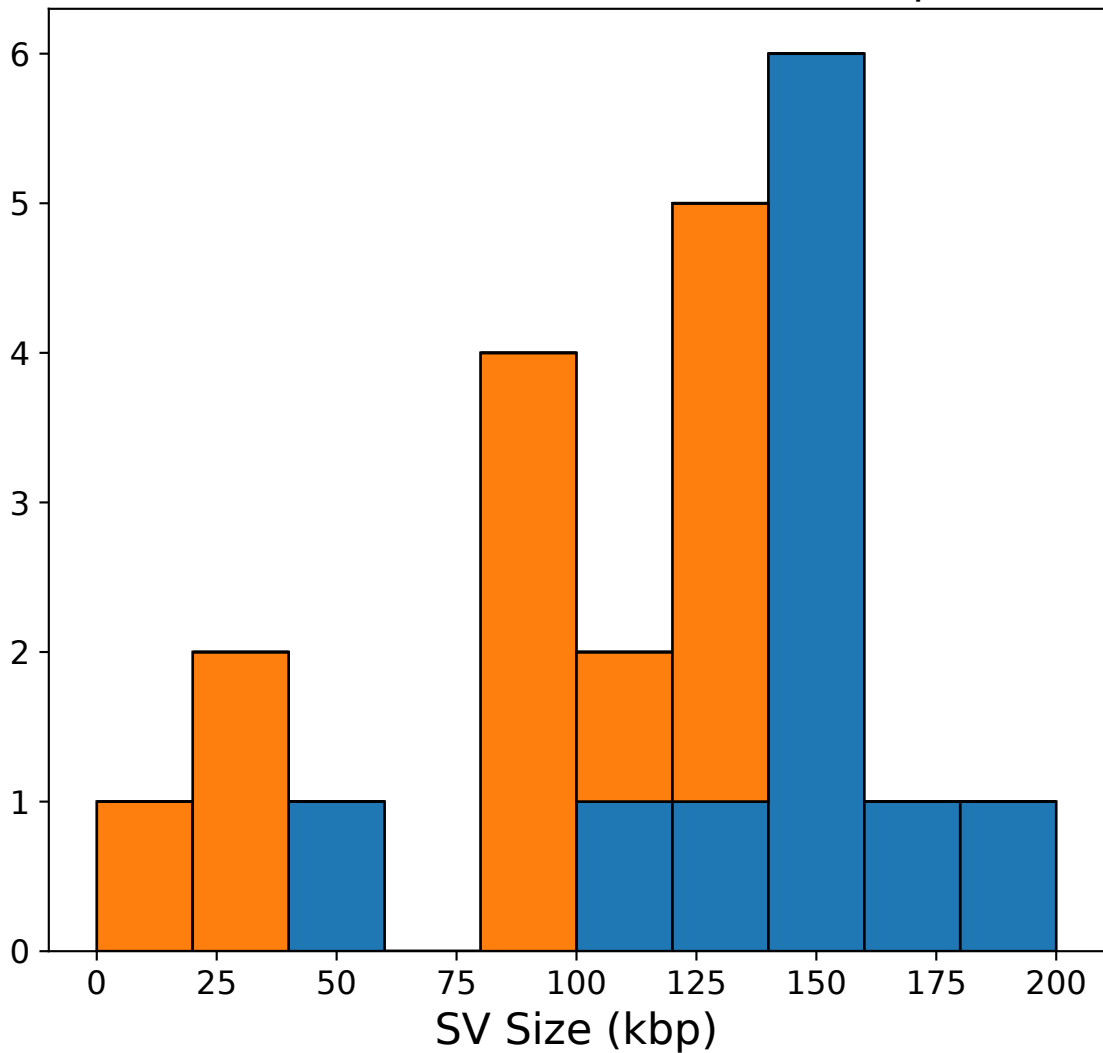

Supplement: Supplemental_Figure_Code.zip [file Distribution of SV Sizes (0-200 kbp).pdf › Supplemental_Figure_Code/OMKar_Manuscript_Figures-main/figures/Distribution of SV Sizes (0-200 kbp).pdf]

# Distribution of SV Sizes

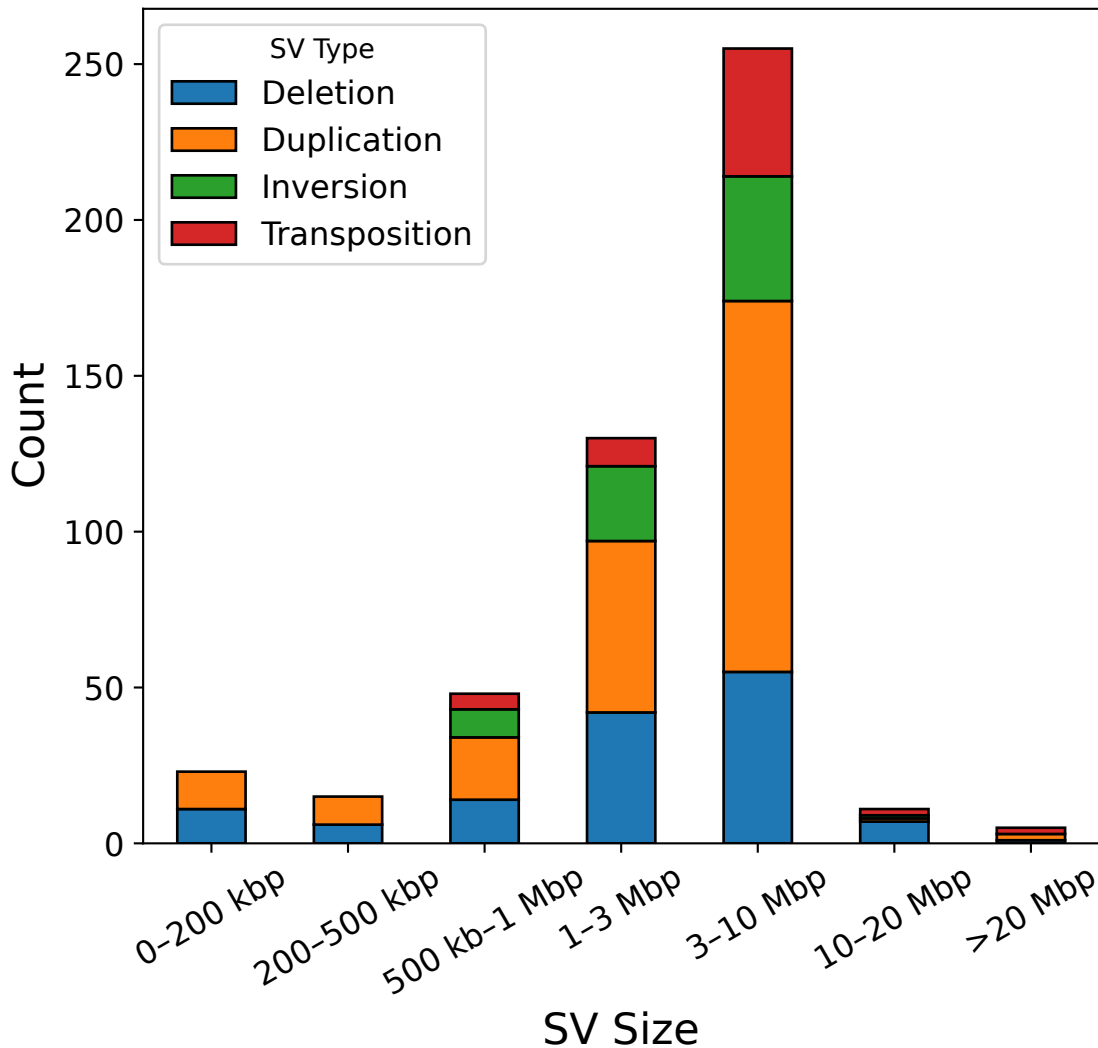

Supplement: Supplemental_Figure_Code.zip [file Distriution of SV Sizes.pdf › Supplemental_Figure_Code/OMKar_Manuscript_Figures-main/figures/Distriution of SV Sizes.pdf]

## Unbalanced SVs2

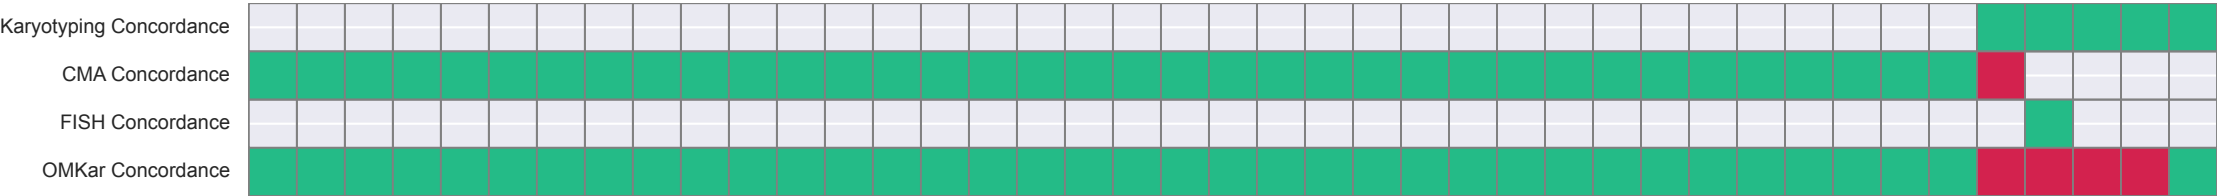

Supplement: Supplemental_Figure_Code.zip [file Unbalanced SVs2.pdf › Supplemental_Figure_Code/OMKar_Manuscript_Figures-main/figures/Unbalanced SVs2.pdf]

# Simulated Clusters CNV-Concordance Jaccard Scores (#clusters=250)

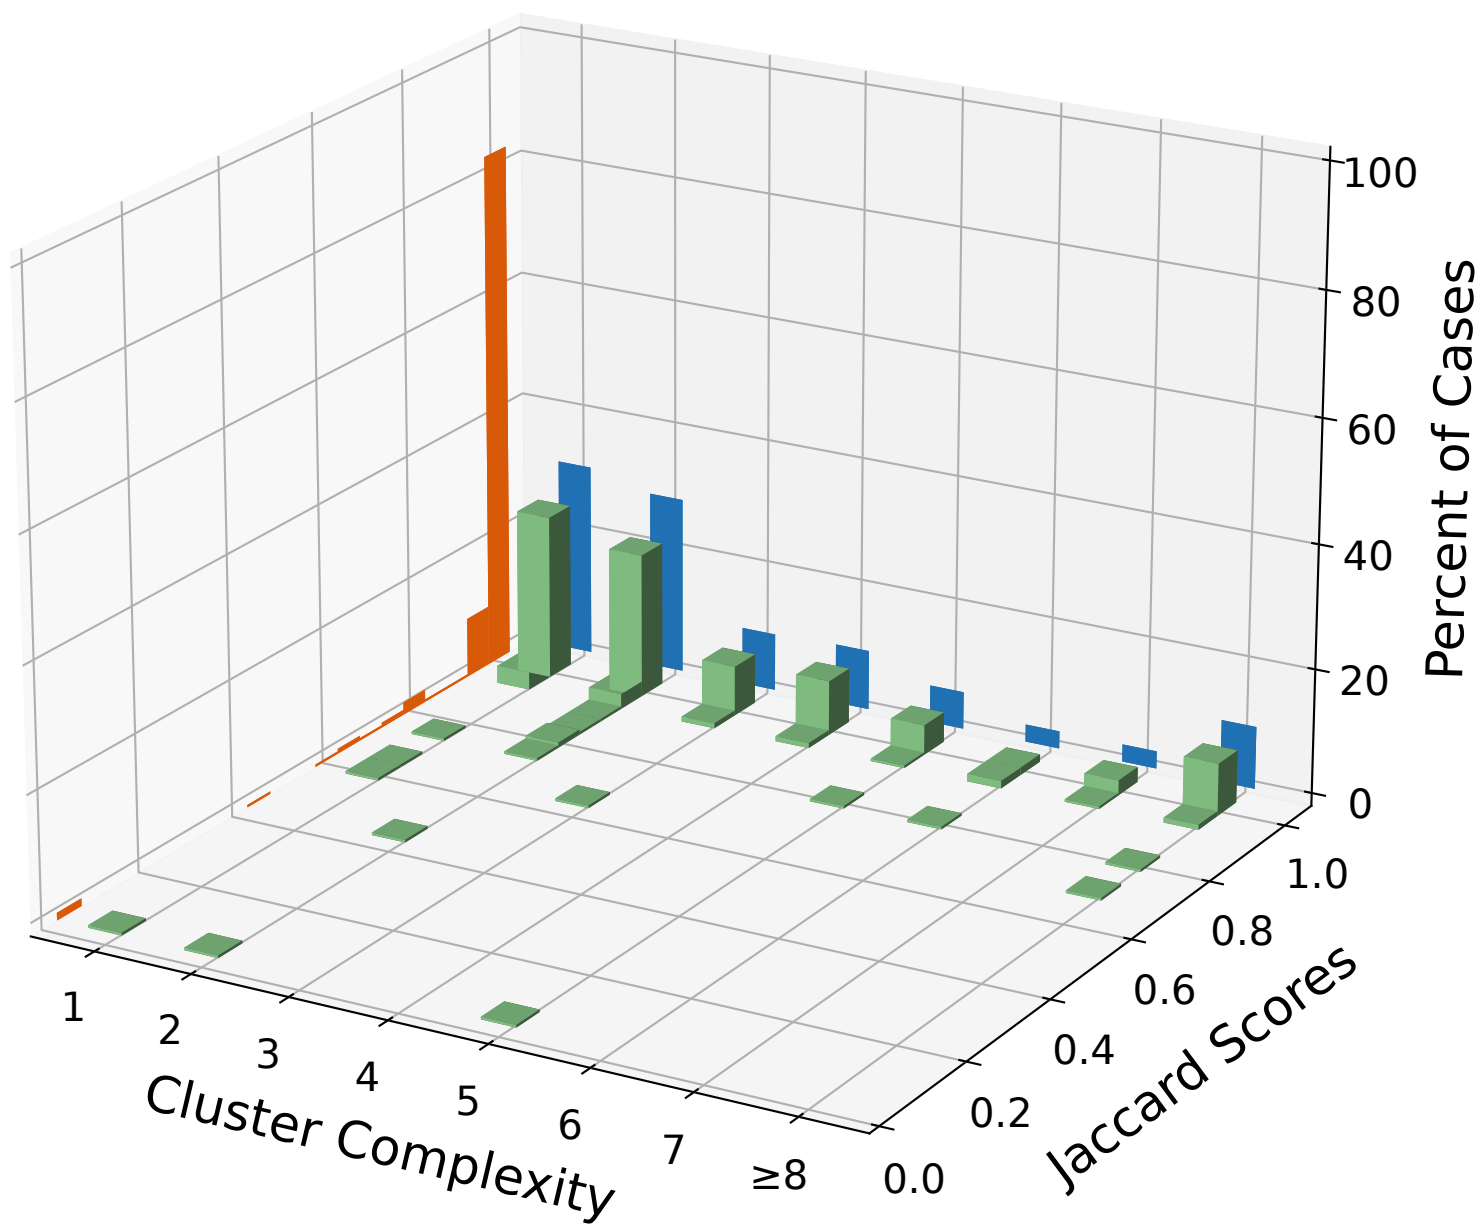

Supplement: Supplemental_Figure_Code.zip [file fig2_CN_histogram.pdf › Supplemental_Figure_Code/OMKar_Manuscript_Figures-main/figures/fig2_CN_histogram.pdf]

# Simulated Clusters SV-Concordance Jaccard Scores (#clusters=250)

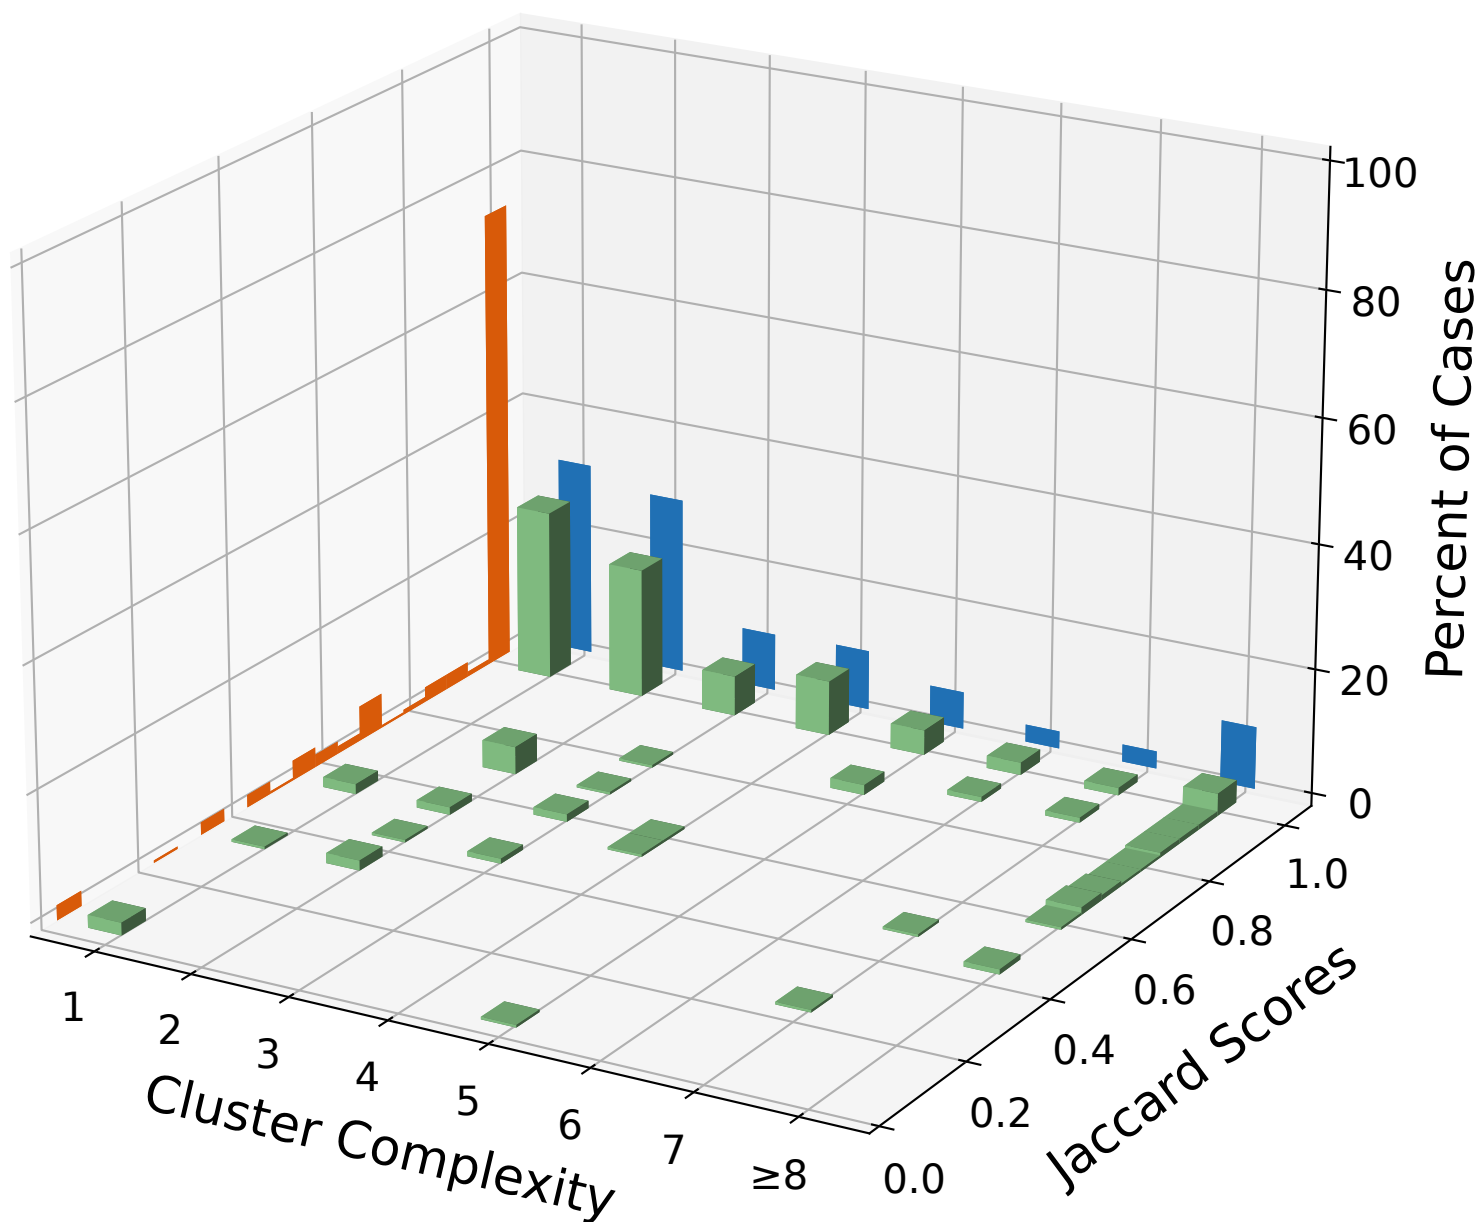

Supplement: Supplemental_Figure_Code.zip [file fig2_karsim_histogram.pdf › Supplemental_Figure_Code/OMKar_Manuscript_Figures-main/figures/fig2_karsim_histogram.pdf]

# Real Data Cluster SV-Concordance Recall (#clusters=132)

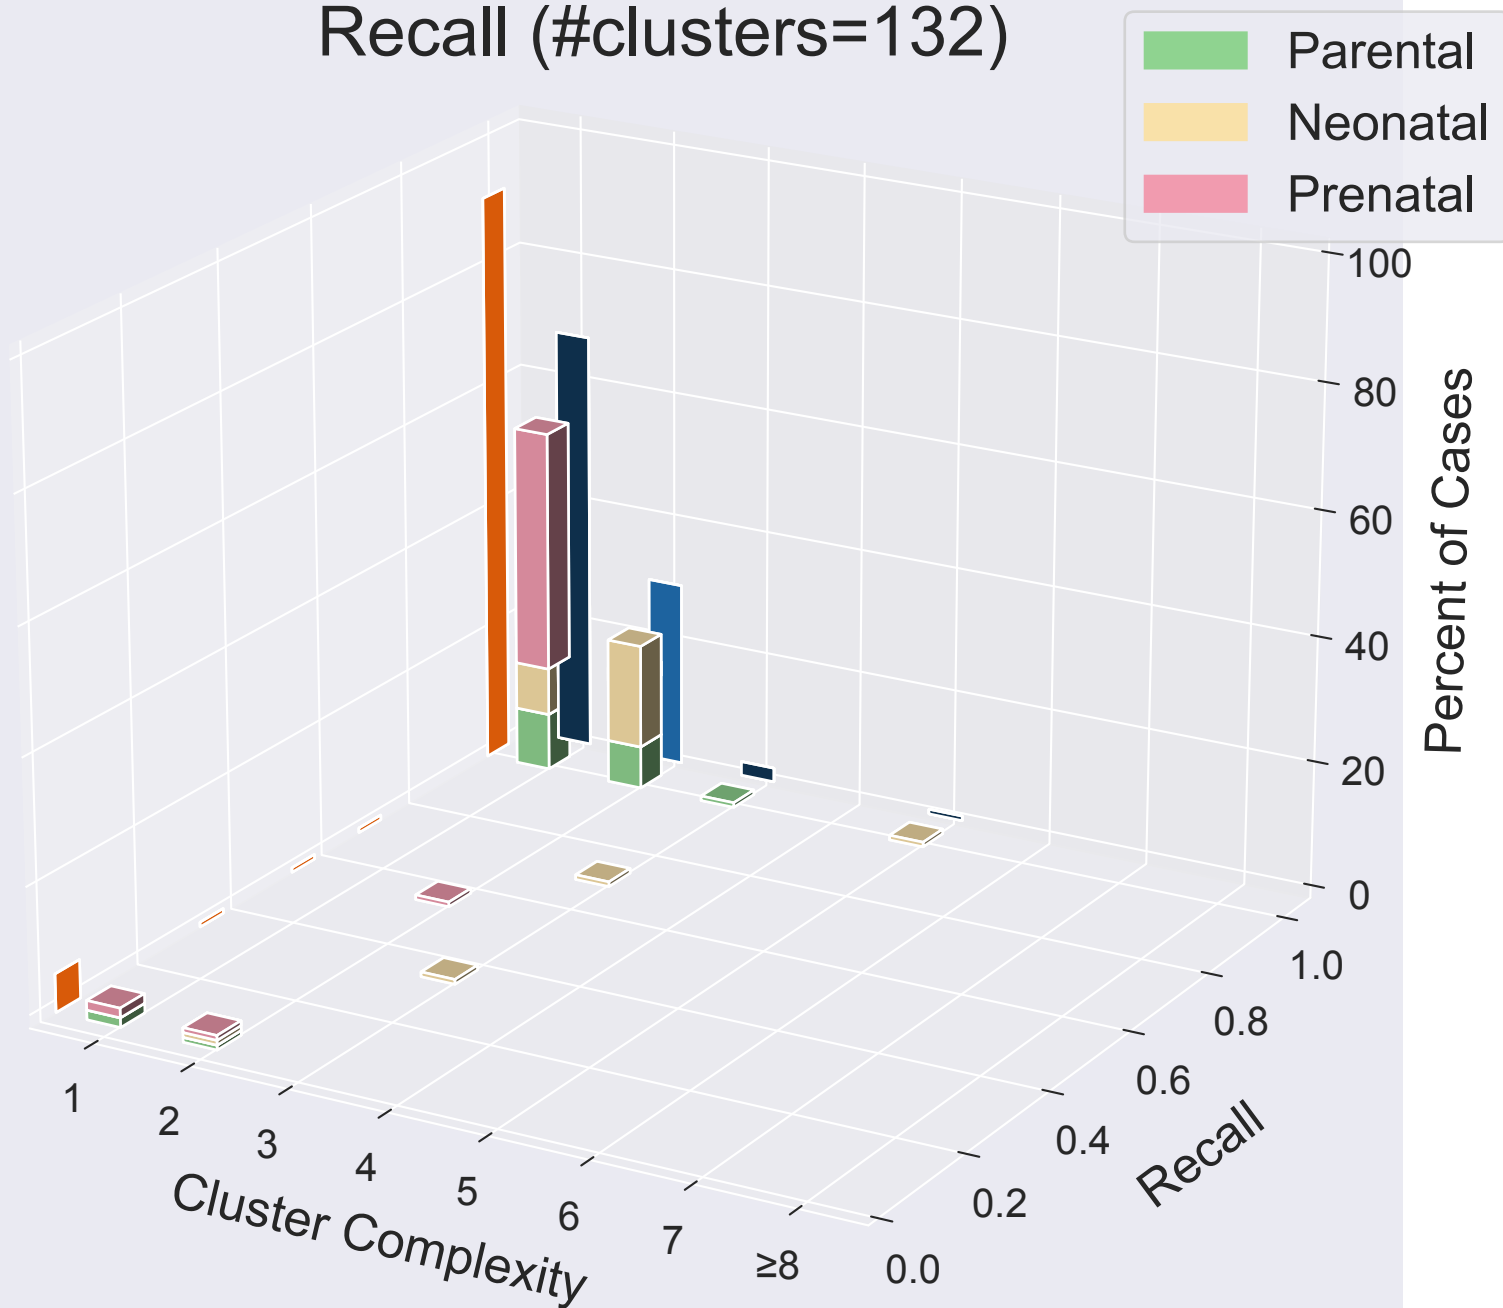

Supplement: Supplemental_Figure_Code.zip [file fig2_realdata.pdf › Supplemental_Figure_Code/OMKar_Manuscript_Figures-main/figures/fig2_realdata.pdf]

## Non-DuplInv Distances

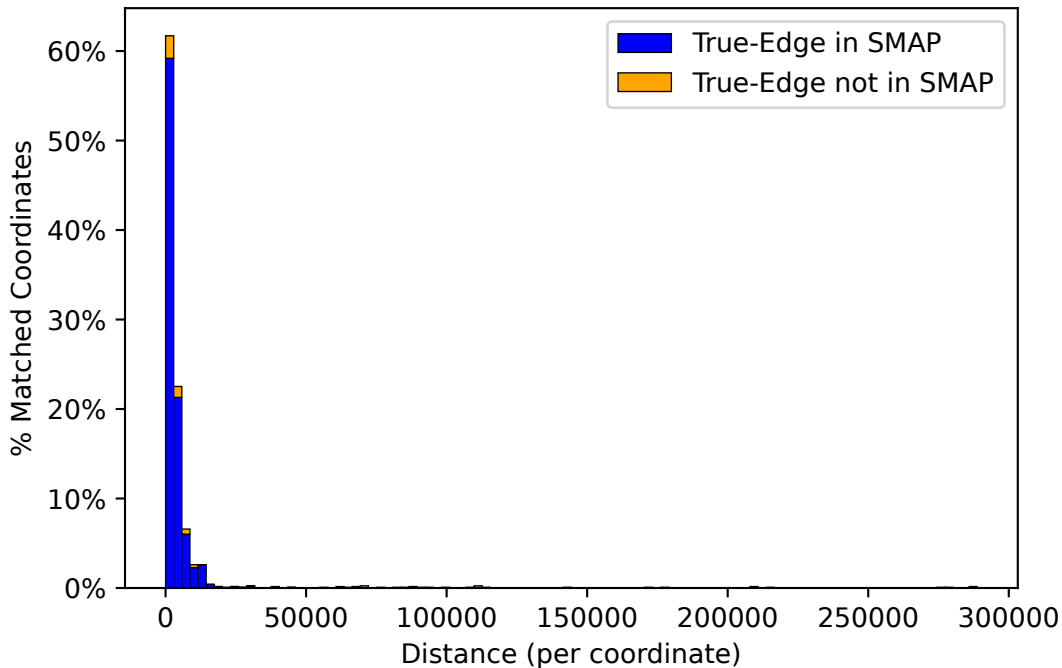

Supplement: Supplemental_Figure_Code.zip [file non_DUPINV.pdf › Supplemental_Figure_Code/OMKar_Manuscript_Figures-main/figures/non_DUPINV.pdf]

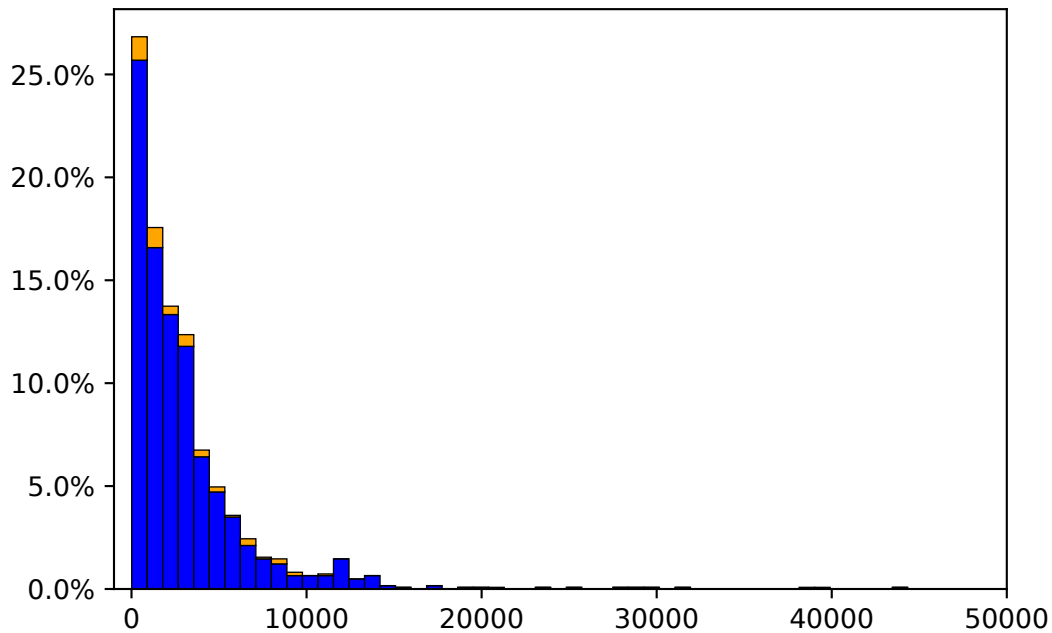

Supplement: Supplemental_Figure_Code.zip [file non_DUPINV_sub.pdf › Supplemental_Figure_Code/OMKar_Manuscript_Figures-main/figures/non_DUPINV_sub.pdf]

Runtime without Report Images vs. #Discordant Edges Reconstructed

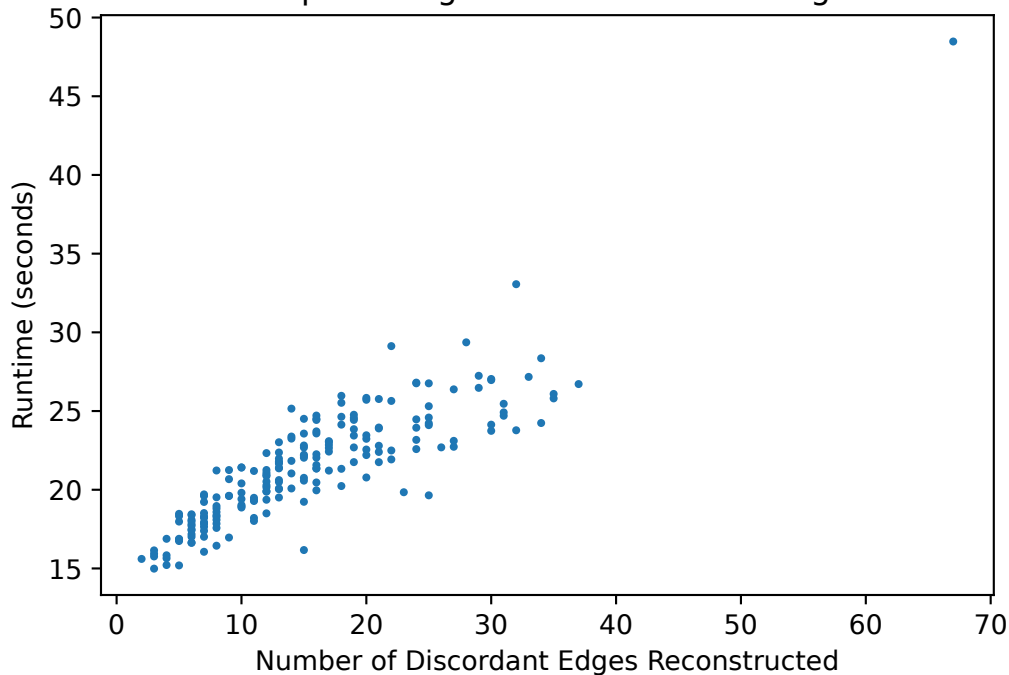

Supplement: Supplemental_Figure_Code.zip [file runtime_with_report_image.pdf › Supplemental_Figure_Code/OMKar_Manuscript_Figures-main/figures/runtime_with_report_image.pdf]

Runtime without Report Images vs. #Discordant Edges Reconstructed

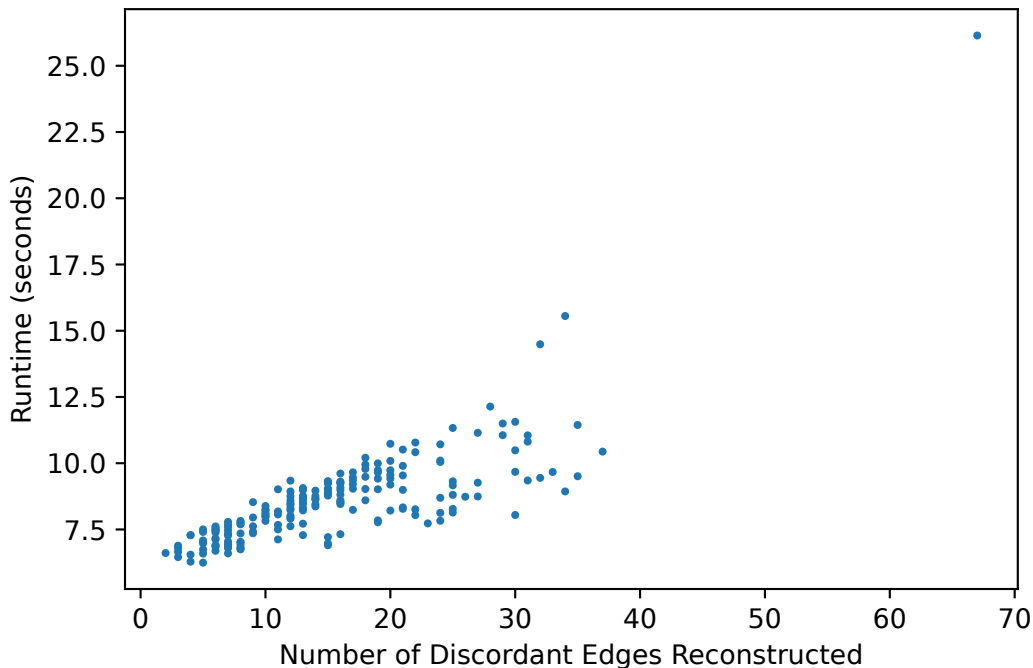

Supplement: Supplemental_Figure_Code.zip [file runtime_without_report_image.pdf › Supplemental_Figure_Code/OMKar_Manuscript_Figures-main/figures/runtime_without_report_image.pdf]
